# Supplementary material
Source: PubMed Central journal article supplement (PMC5083236)

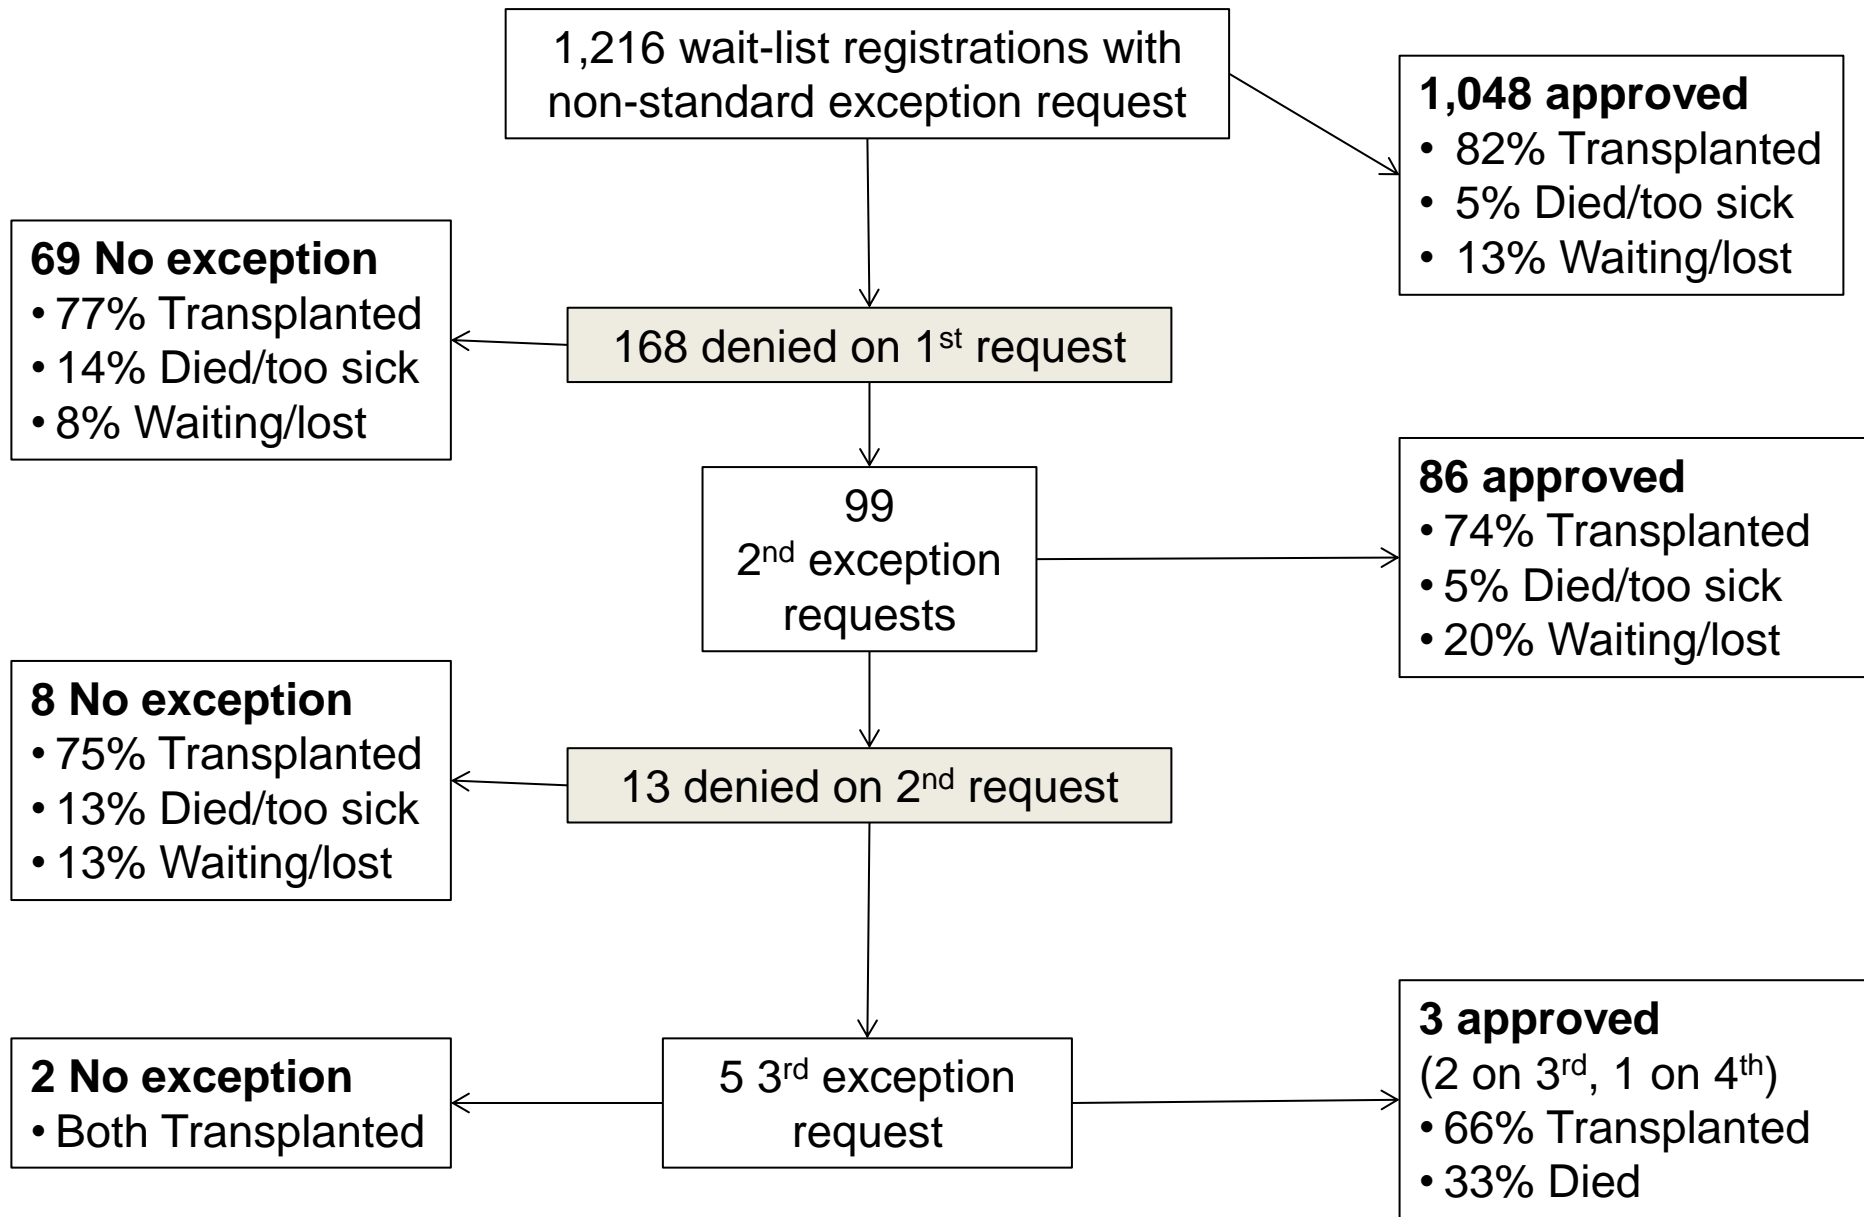

Figure S1

Supplement: NIHMS789327-supplement-Supp_Info.pdf [file NIHMS789327-supplement-Supp_Info.pdf]
